# Supplementary material for: Heterologous Expression of a VioA Variant Activates Cryptic Compounds in a Marine-Derived Brevibacterium Strain
Source: MDPI journal article supplement (doi:10.3390/md16060191), 2018-06-02
Supplement: s1 [file s1]

## Supporting Information

### **Heterologous Expression of a VioA Variant Activates Cryptic Compounds in a Marine-derived *Brevibacterium* strain**

Xiao Han,<sup>†,‡</sup> Lukuan Hou,<sup>†,‡</sup> Jing Hou,<sup>†</sup> Yongyu Zhang,<sup>§</sup> Huayue Li,<sup>\*,†,‡</sup> Wenli Li<sup>\*,†,‡</sup>

<sup>†</sup>Key Laboratory of Marine Drugs, Ministry of Education, School of Medicine and Pharmacy, Ocean University of China, Qingdao 266003, China

<sup>‡</sup>Key Laboratory of Marine Drugs, Ministry of Education, School of Medicine and Pharmacy, Ocean University of China, Qingdao 266003, China

<sup>§</sup>Qingdao Institute of Biomass Energy and Bioprocess Technology, Chinese Academy of Sciences, Qingdao 266003, China

## Table of Contents

**Figure S1.** Structures of (A) violapyrones and (B) photopyrones

**Figure S2.** Gel electrophoresis of PCR products

**Figure S3.** Culture broth of the wild type and recombinant strains of *Brevibacterium* sp. 7002-073

**Figure S4.** The HR-ESIMS spectrum of **3**

**Figure S5.**  $^1\text{H}$  NMR spectrum of **3** in  $\text{CD}_3\text{OD}$  (600 MHz)

**Figure S6.** COSY spectrum of **3** in  $\text{CD}_3\text{OD}$  (600 MHz)

**Figure S7.** HSQC spectrum of **3** in  $\text{CD}_3\text{OD}$  (600 MHz)

**Figure S8.** HMBC spectrum of **3** in  $\text{CD}_3\text{OD}$  (600 MHz)

**Figure S9.** NOESY spectrum of **3** in  $\text{CD}_3\text{OD}$  (600 MHz)

**Figure S10.** The HR-ESIMS spectrum of **1**

**Figure S11.**  $^1\text{H}$  NMR spectrum of **1** in  $\text{CD}_3\text{OD}$  (600 MHz)

**Figure S12.** COSY spectrum of **1** in  $\text{CD}_3\text{OD}$  (600 MHz)

**Figure S13.** HSQC spectrum of **1** in  $\text{CD}_3\text{OD}$  (600 MHz)

**Figure S14.** HMBC spectrum of **1** in  $\text{CD}_3\text{OD}$  (600 MHz)

**Figure S15.** The HR-ESIMS spectrum of **2**

**Figure S16.**  $^1\text{H}$  NMR spectrum of **2** in  $\text{CD}_3\text{OD}$  (500 MHz)

**Figure S17.** The HR-ESIMS spectrum of **4**

**Figure S18.**  $^1\text{H}$  NMR spectrum of **4** in  $\text{CD}_3\text{OD}$  (600 MHz)

**Figure S19.** COSY spectrum of **4** in  $\text{CD}_3\text{OD}$  (600 MHz)

**Figure S20.** HSQC spectrum of **4** in  $\text{CD}_3\text{OD}$  (600 MHz)

**Figure S21.** HMBC spectrum of **4** in  $\text{CD}_3\text{OD}$  (600 MHz)

**Figure S22.** The HR-ESIMS spectrum of **5**

**Figure S23.**  $^1\text{H}$  NMR spectrum of **5** in  $\text{DMSO}-d_6$  (600 MHz)

**Figure S24.** COSY spectrum of **5** in  $\text{DMSO}-d_6$  (600 MHz)

**Figure S25.** HSQC spectrum of **5** in  $\text{DMSO}-d_6$  (600 MHz)

**Figure S26.** HMBC spectrum of **5** in  $\text{DMSO}-d_6$  (600 MHz)

**Table S1.** The  $^1\text{H}$  and  $^{13}\text{C}$  NMR chemical shifts of **1** in  $\text{DMSO}-d_6$  (600 MHz)

**Table S2.** The  $^1\text{H}$  and  $^{13}\text{C}$  NMR chemical shifts of **2** in  $\text{CD}_3\text{OD}$  (500 MHz)

**Table S3.** The  $^1\text{H}$  and  $^{13}\text{C}$  NMR chemical shifts of **4** in  $\text{CD}_3\text{OD}$  (600 MHz)

**Table S4.** The  $^1\text{H}$  and  $^{13}\text{C}$  NMR chemical shifts of **5** in  $\text{DMSO}-d_6$  (600 MHz)

**Table S5.** The plasmids used in this study

**Table S6.** Primer pairs used in this study

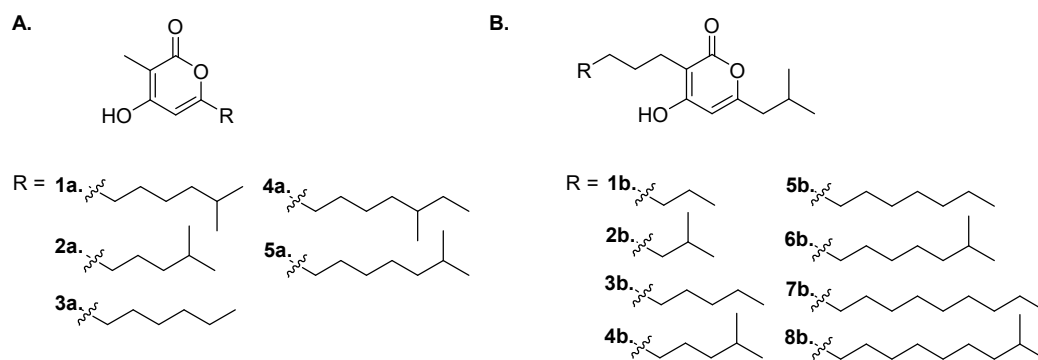

**Figure S1.** Structures of (A) violapyrones and (B) photopyrones.

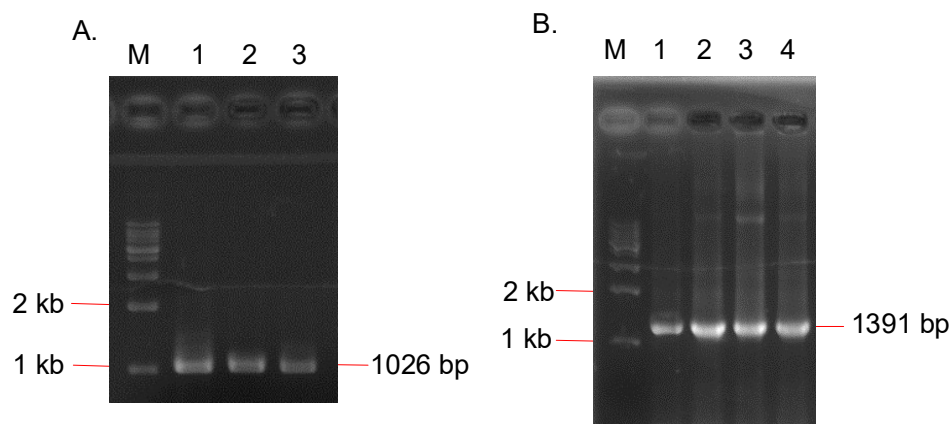

**Figure S2.** PCR confirmation of 7002-073/pMT3 (A) and 7002-073/pWLI823 (B) strains. (A) lane M, 1kb DNA marker; lane 1, pMT3 (positive control); lane 2-3, 7002-073/pMT3. (B) lane M, 1kb DNA marker; lane 1, pWLI823 (positive control); lane 2-4, 7002-073/pWLI823 (lane 2-4).

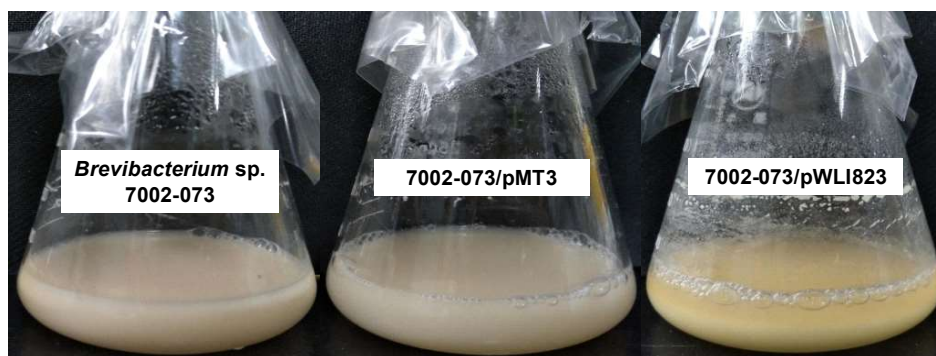

**Figure S3.** Culture broth of the wild type and recombinant strains of *Brevibacterium* sp. 7002-073.

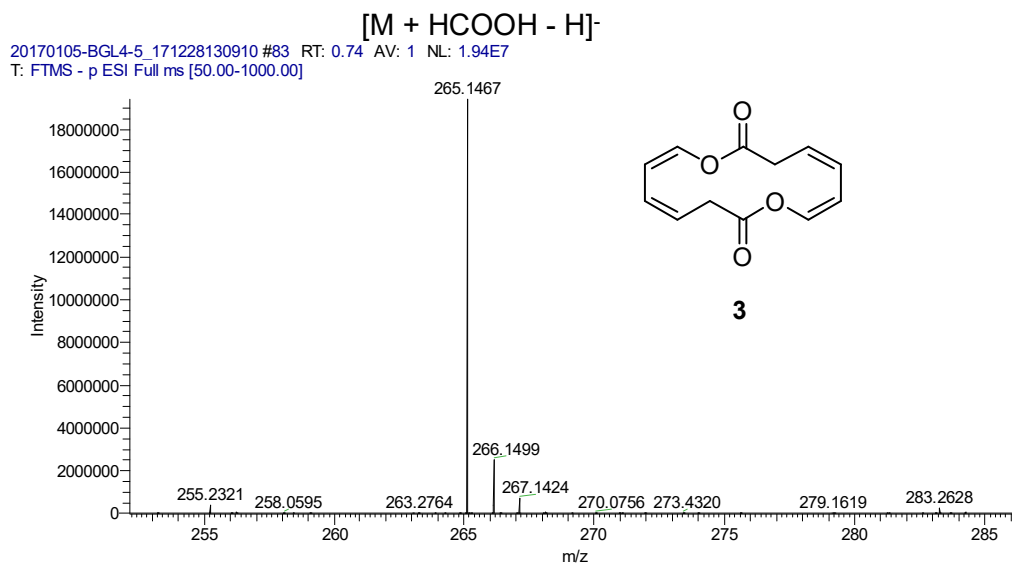

**Figure S4.** The HR-ESIMS spectrum of **3**

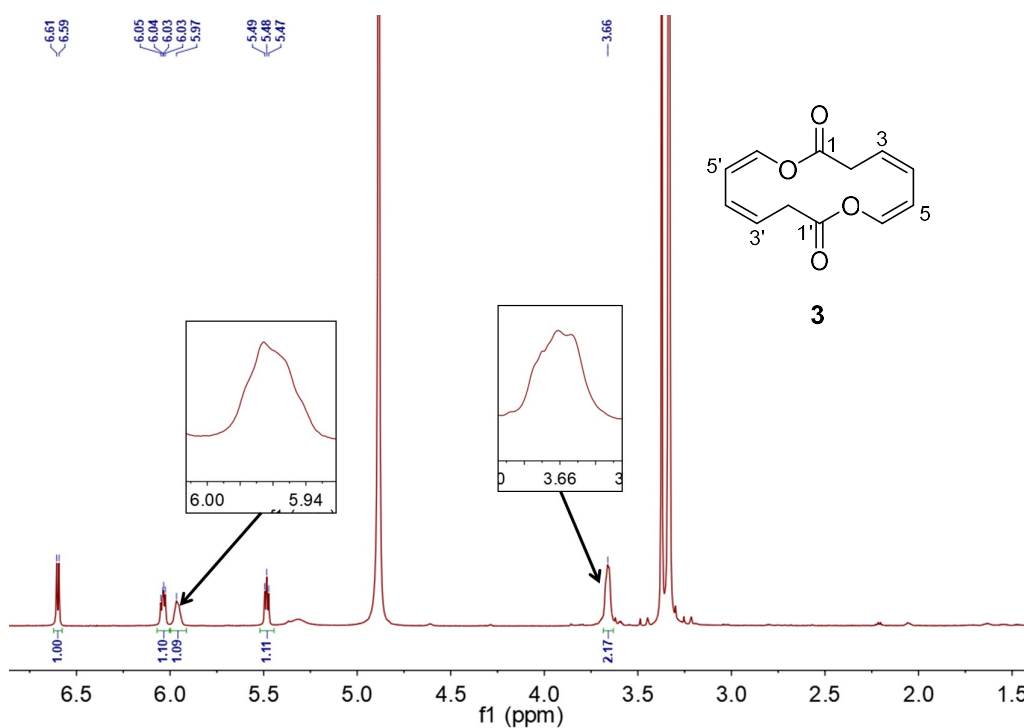

**Figure S5.** <sup>1</sup>H NMR spectrum of **3** in CD<sub>3</sub>OD (600 MHz)

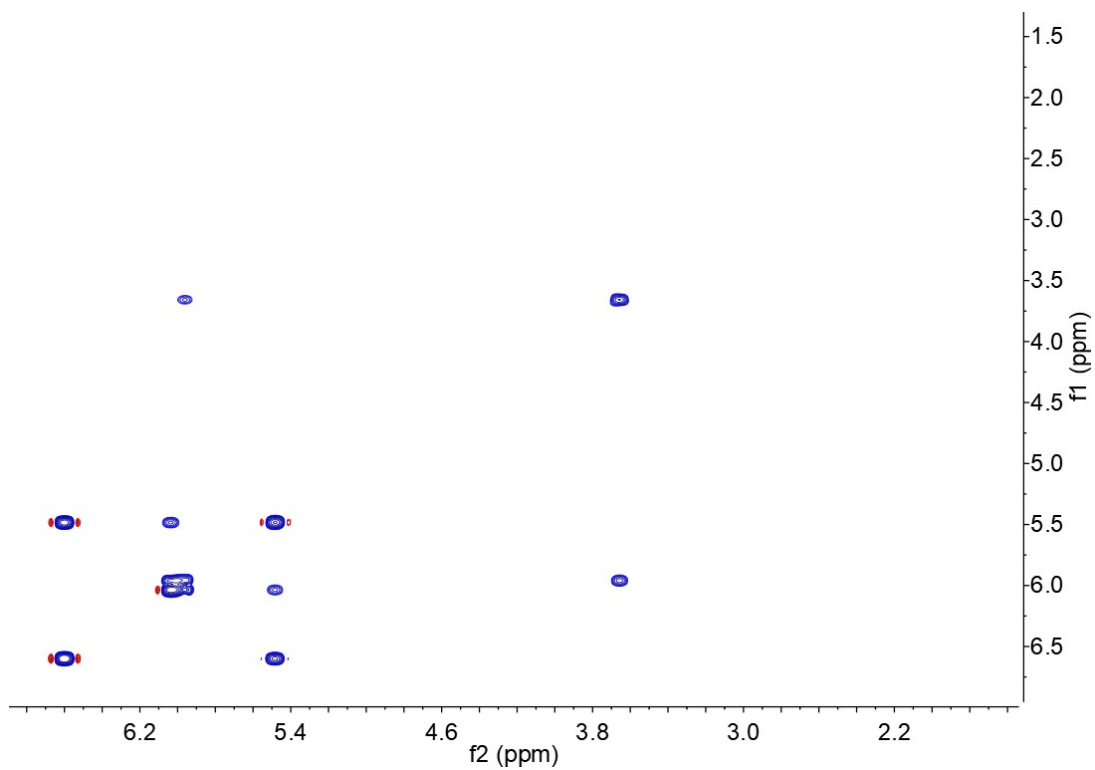

**Figure S6.** The  $^1\text{H}$ - $^1\text{H}$  COSY spectrum of **3** in  $\text{CD}_3\text{OD}$  (600 MHz)

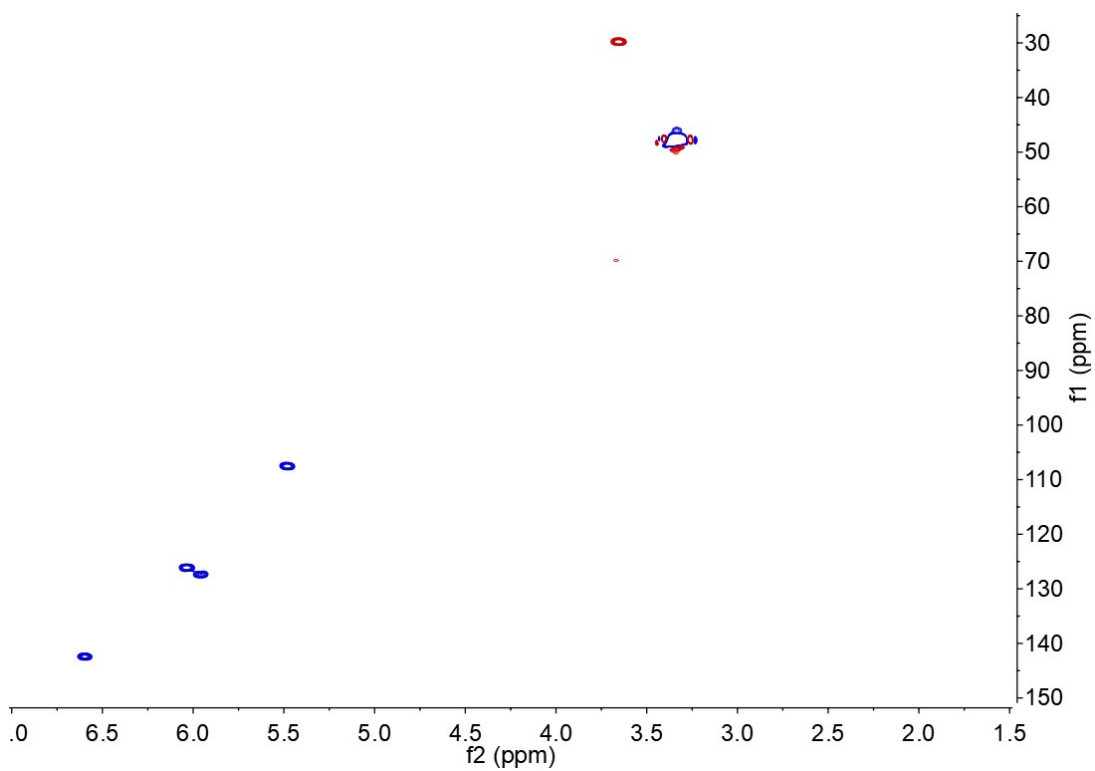

**Figure S7.** The HSQC spectrum of **3** in  $\text{CD}_3\text{OD}$  (600 MHz)

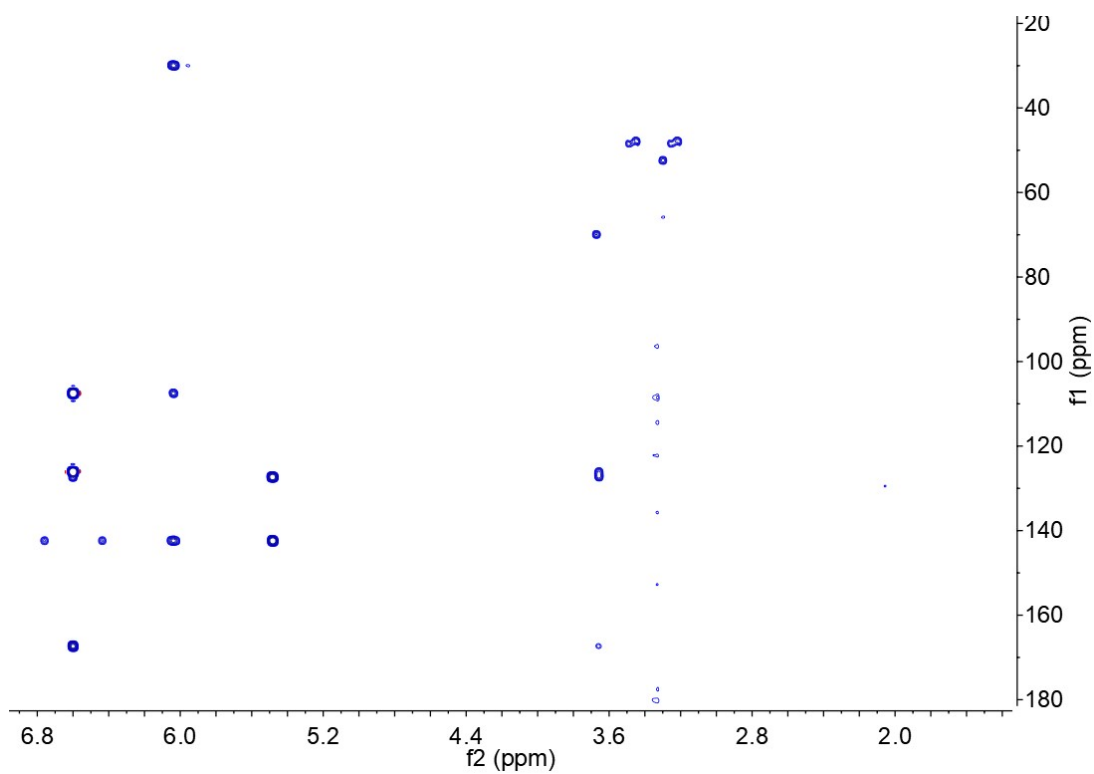

**Figure S8.** The HMBC spectrum of **3** in CD<sub>3</sub>OD (600 MHz)

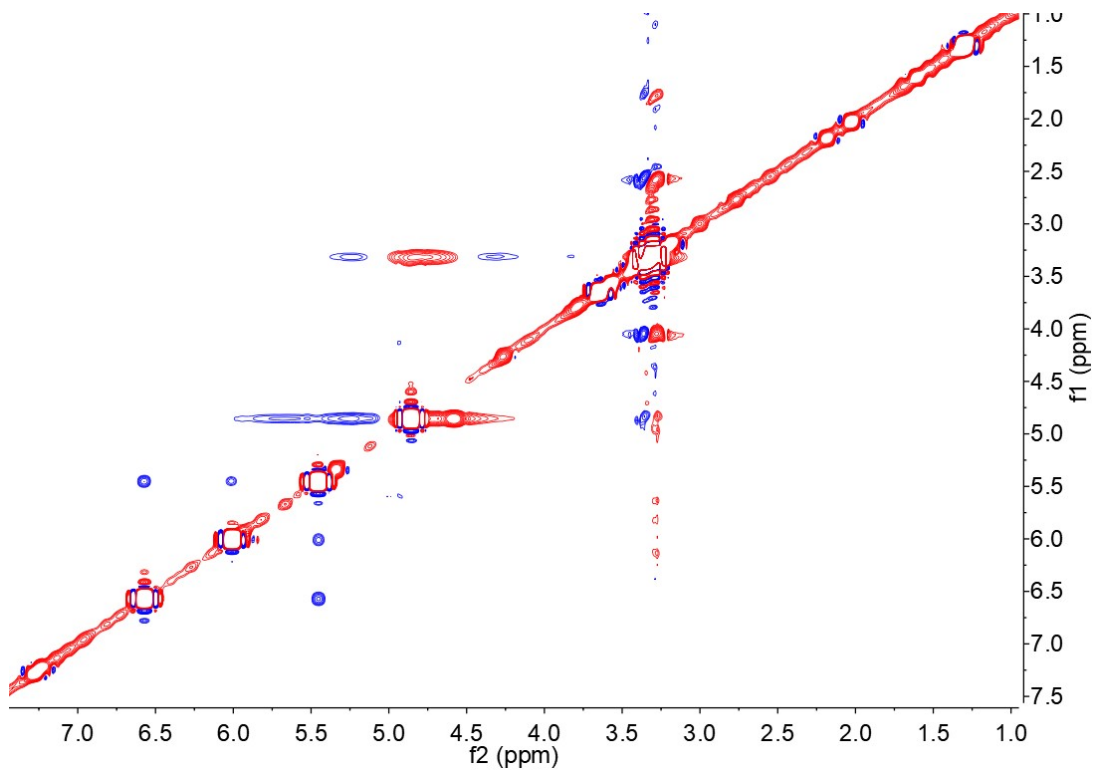

**Figure S9.** The NOESY spectrum of **3** in CD<sub>3</sub>OD (600 MHz)

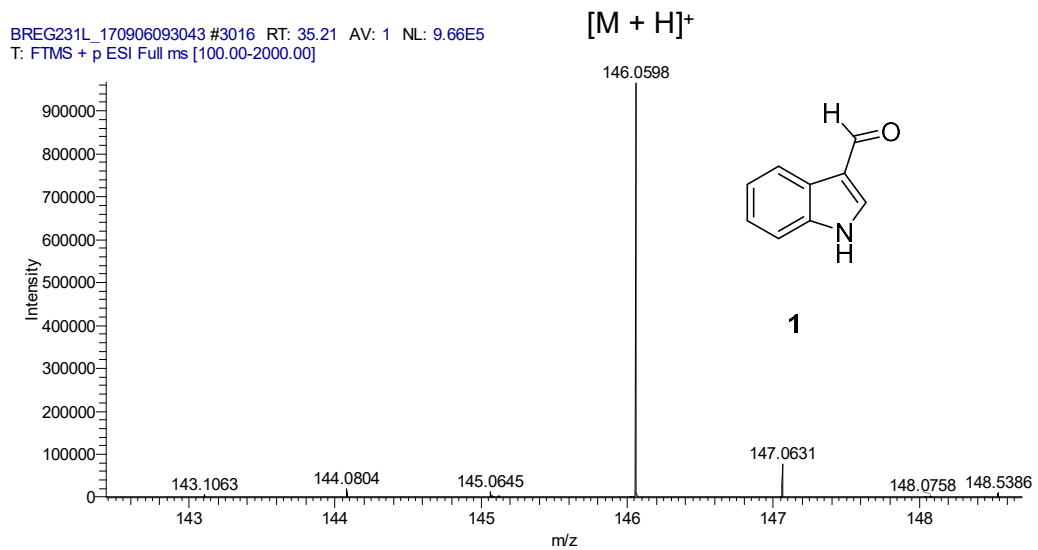

**Figure S10.** The HR-ESIMS spectrum of **1**

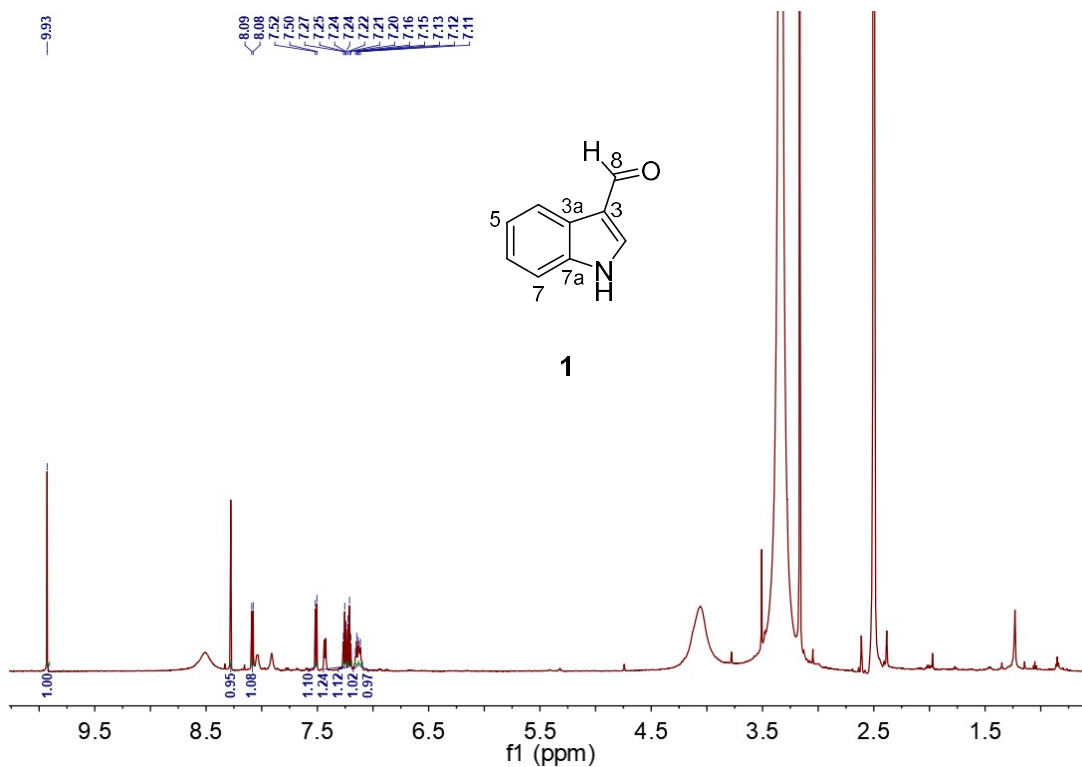

**Figure S11.** <sup>1</sup>H NMR spectrum of **1** in DMSO-*d*<sub>6</sub> (600 MHz)



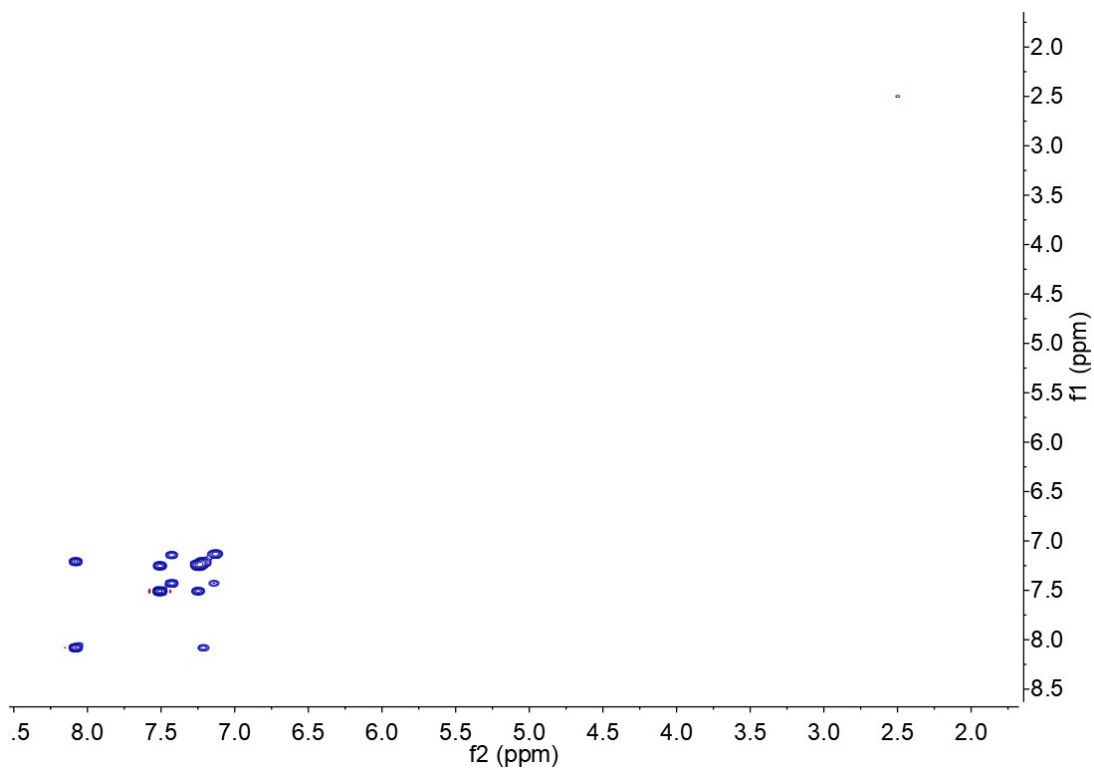

**Figure S12.** The  $^1\text{H}$ - $^1\text{H}$  COSY spectrum of **1** in  $\text{DMSO-}d_6$  (600 MHz)

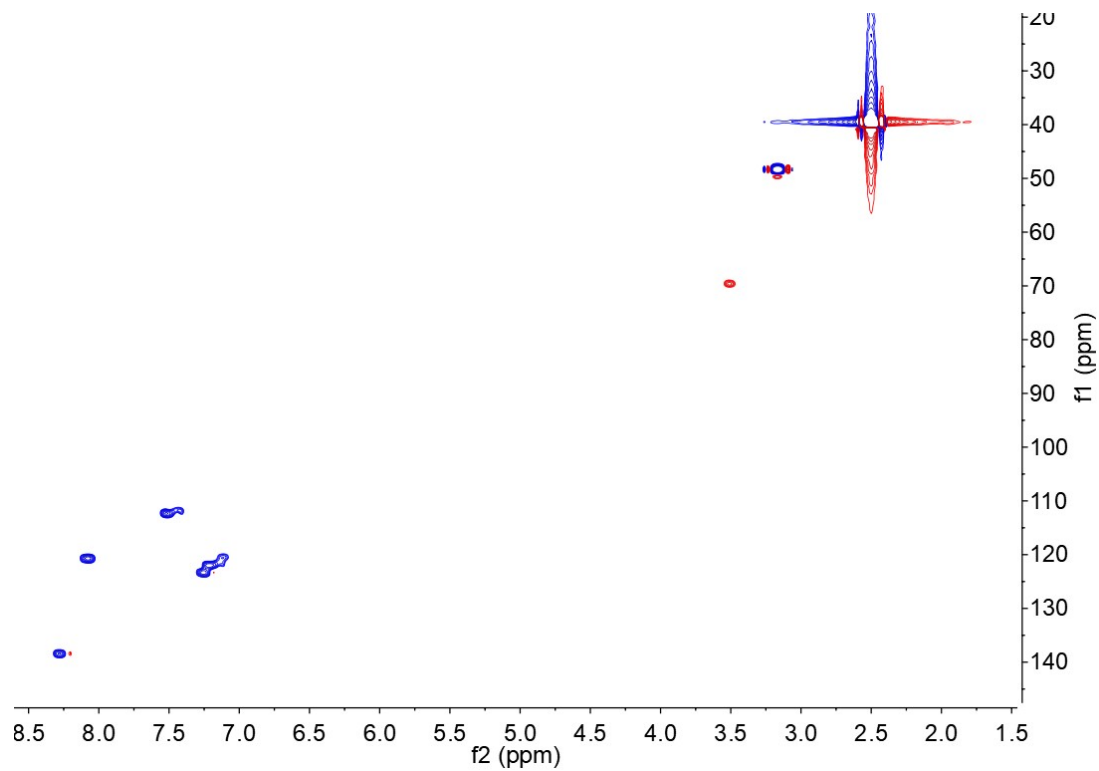

**Figure S13.** The HSQC spectrum of **1** in  $\text{DMSO-}d_6$  (600 MHz)

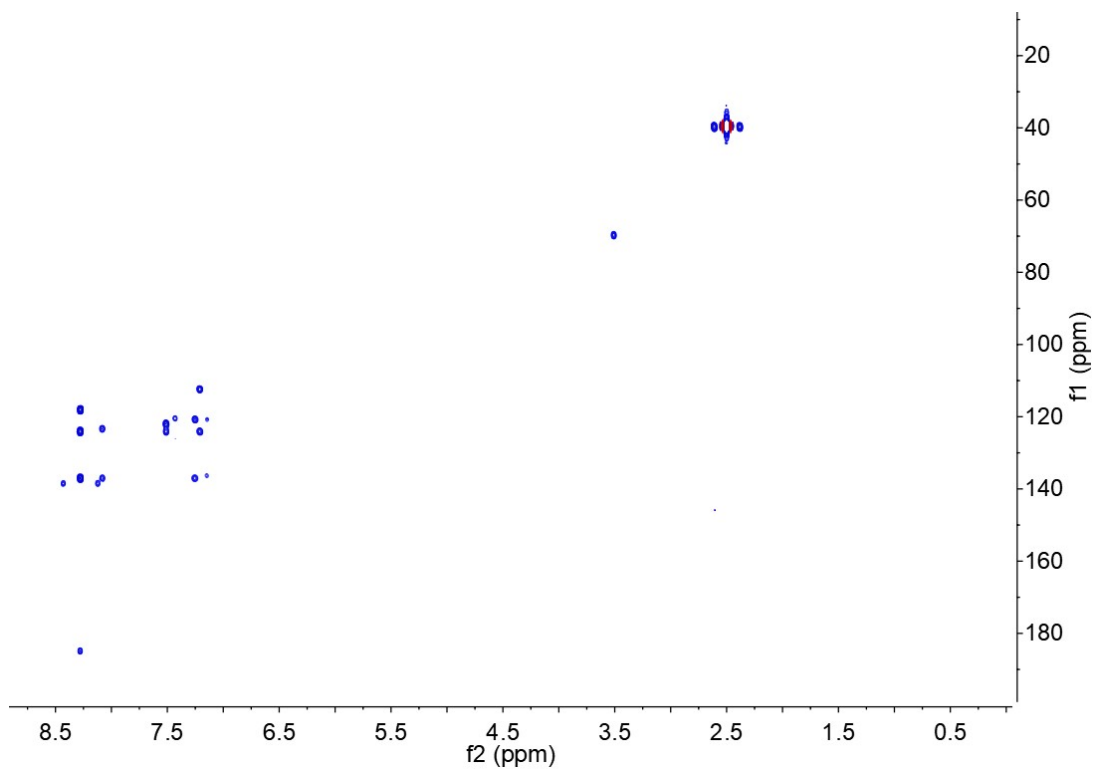

**Figure S14.** The HMBC spectrum of **1** in DMSO- $d_6$  (600 MHz)

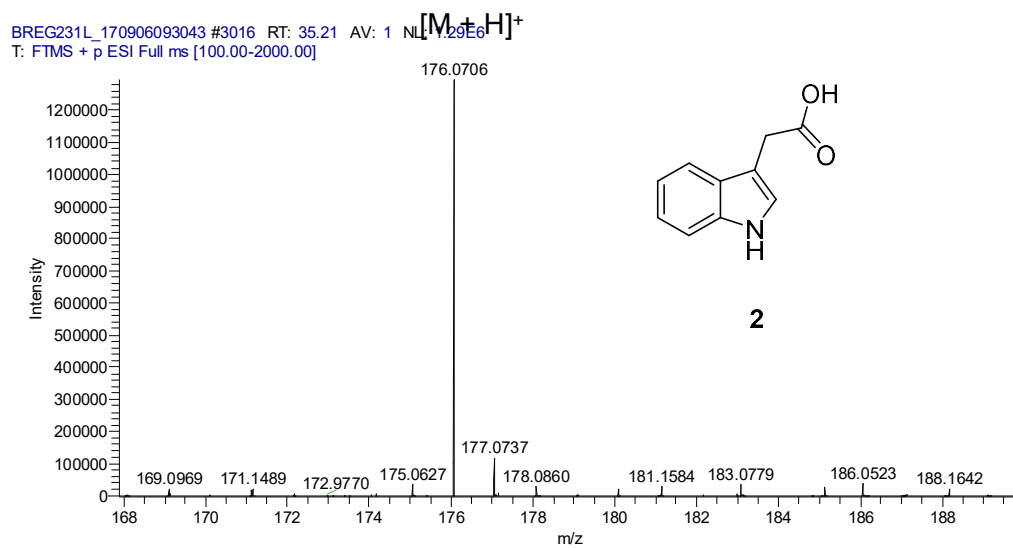

**Figure S15.** The HR-ESIMS spectrum of **2**

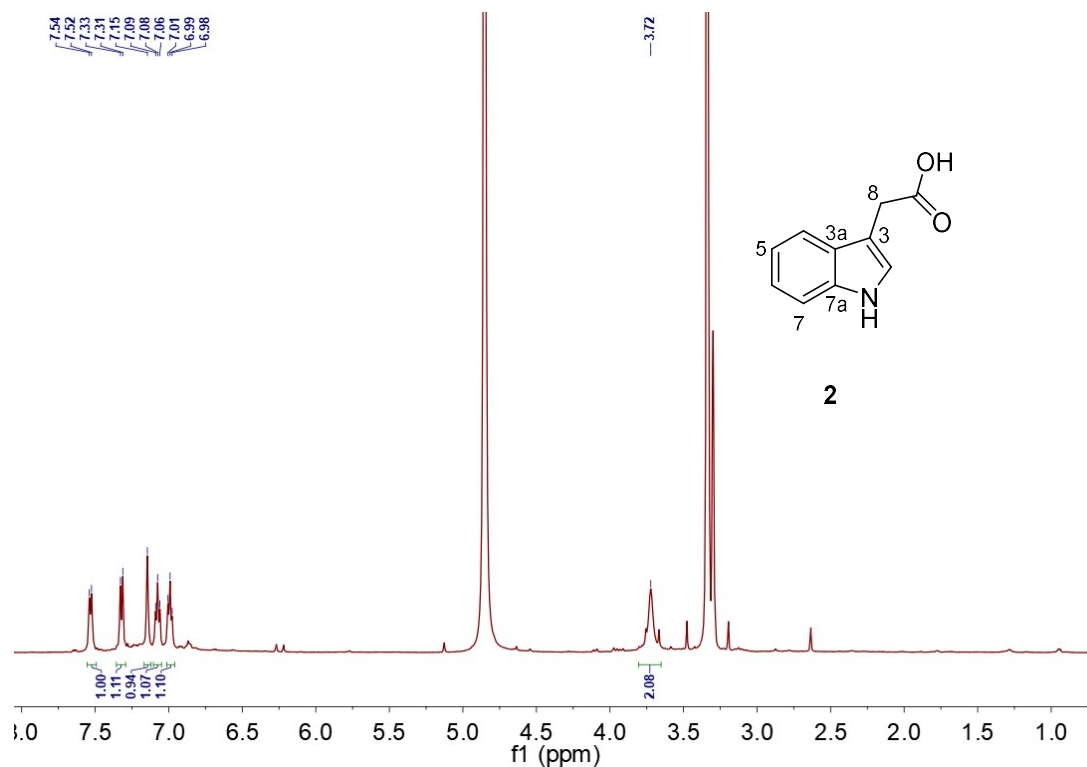

**Figure S16.** <sup>1</sup>H NMR spectrum of **2** in CD<sub>3</sub>OD (500 MHz)

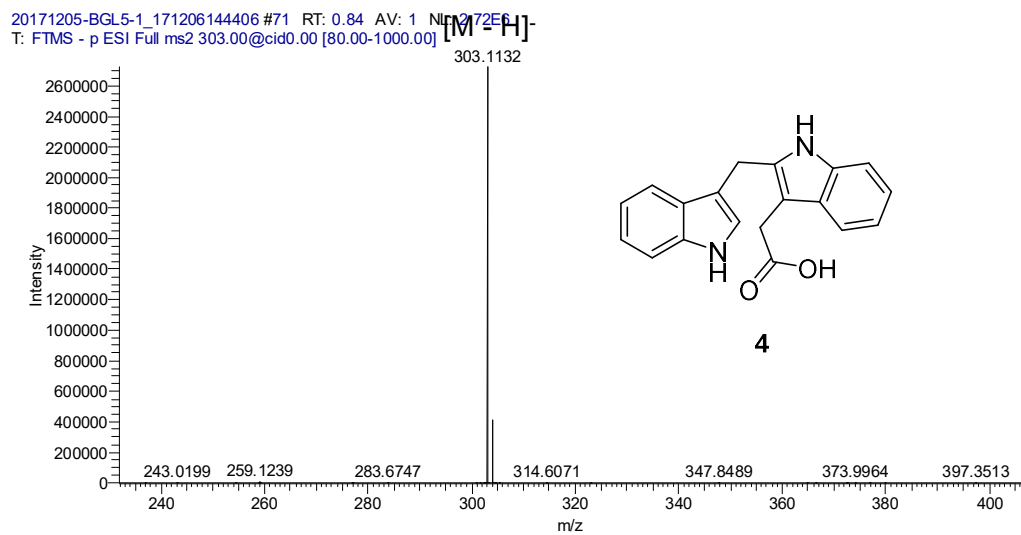

**Figure S17.** The HR-ESIMS spectrum of **4**

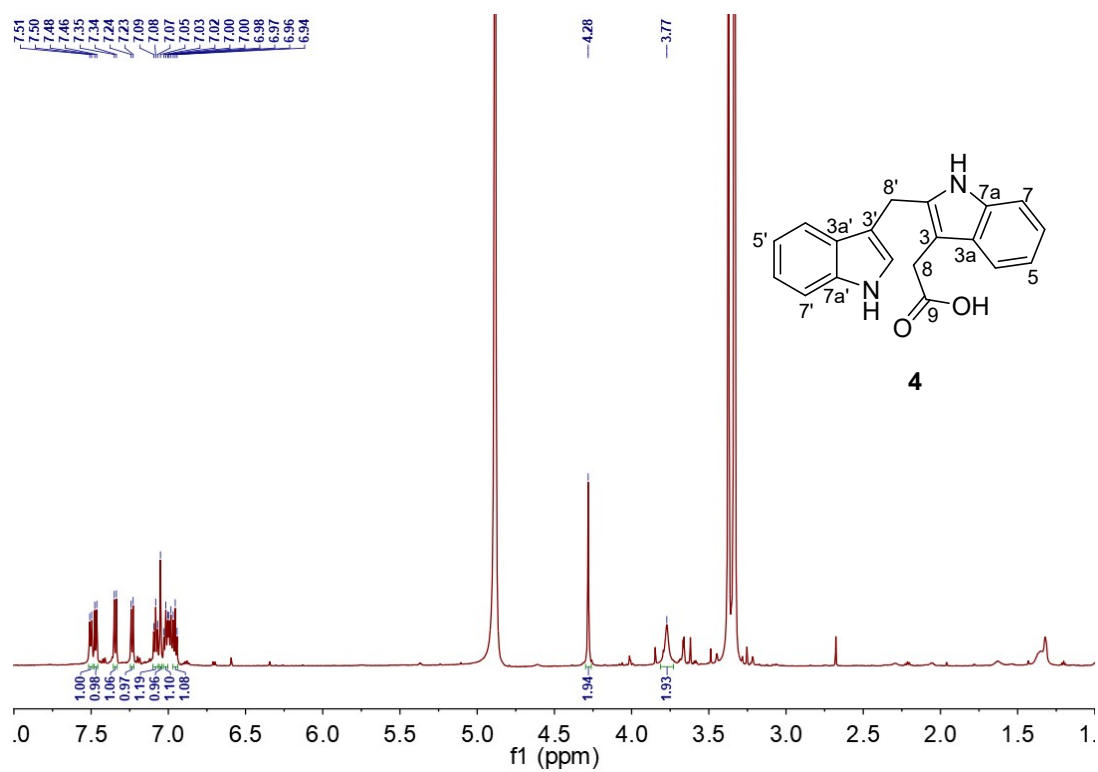

**Figure S18.**  $^1\text{H}$  NMR spectrum of **4** in  $\text{CD}_3\text{OD}$  (600 MHz)

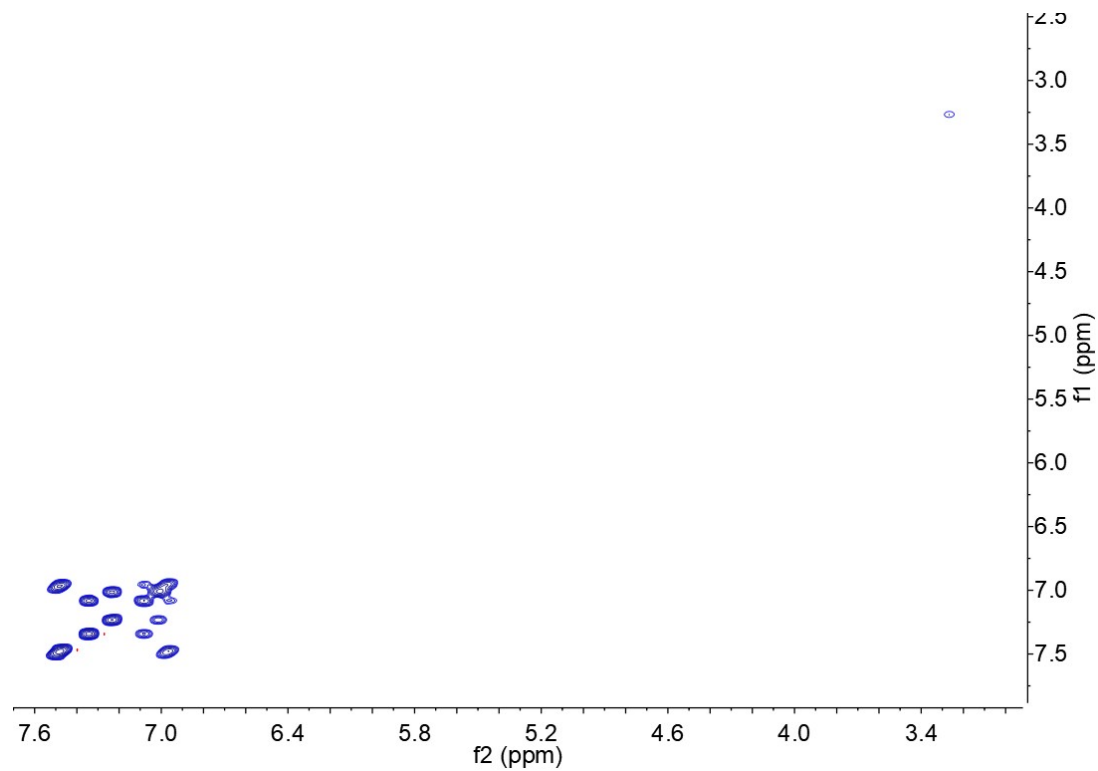

**Figure S19.** The  $^1\text{H}$ - $^1\text{H}$  COSY spectrum of **4** in  $\text{CD}_3\text{OD}$  (600 MHz)

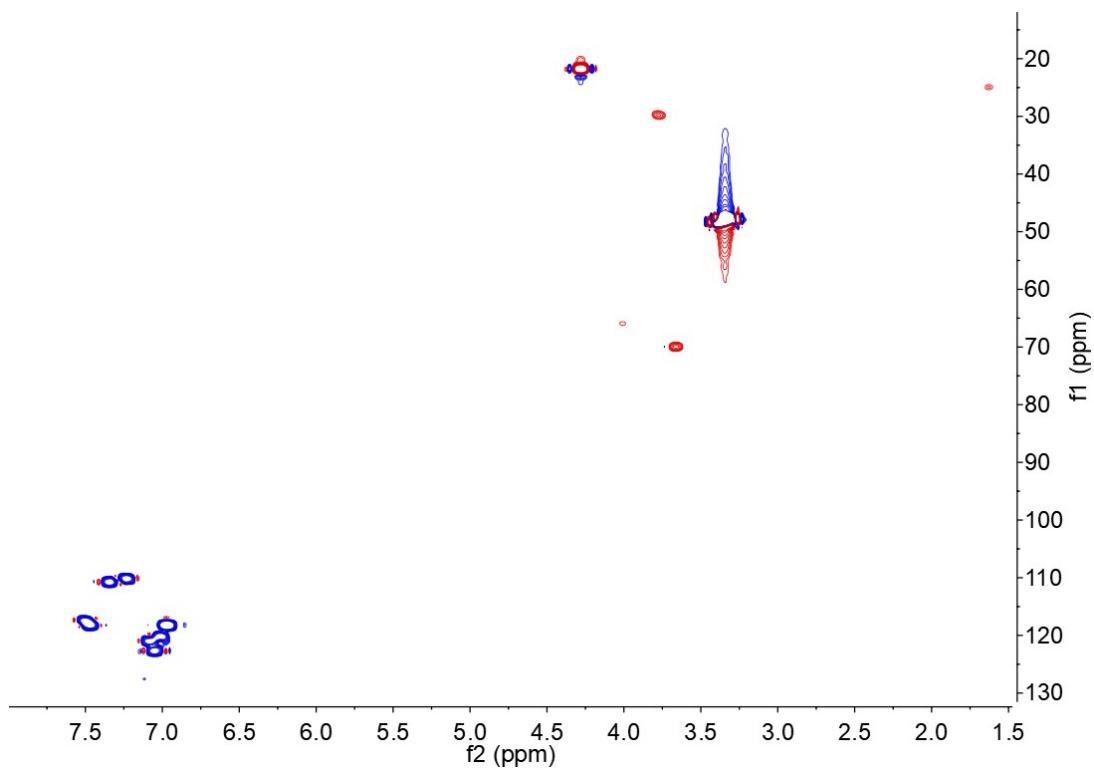

**Figure S20.** The HSQC spectrum of **4** in CD<sub>3</sub>OD (600 MHz)

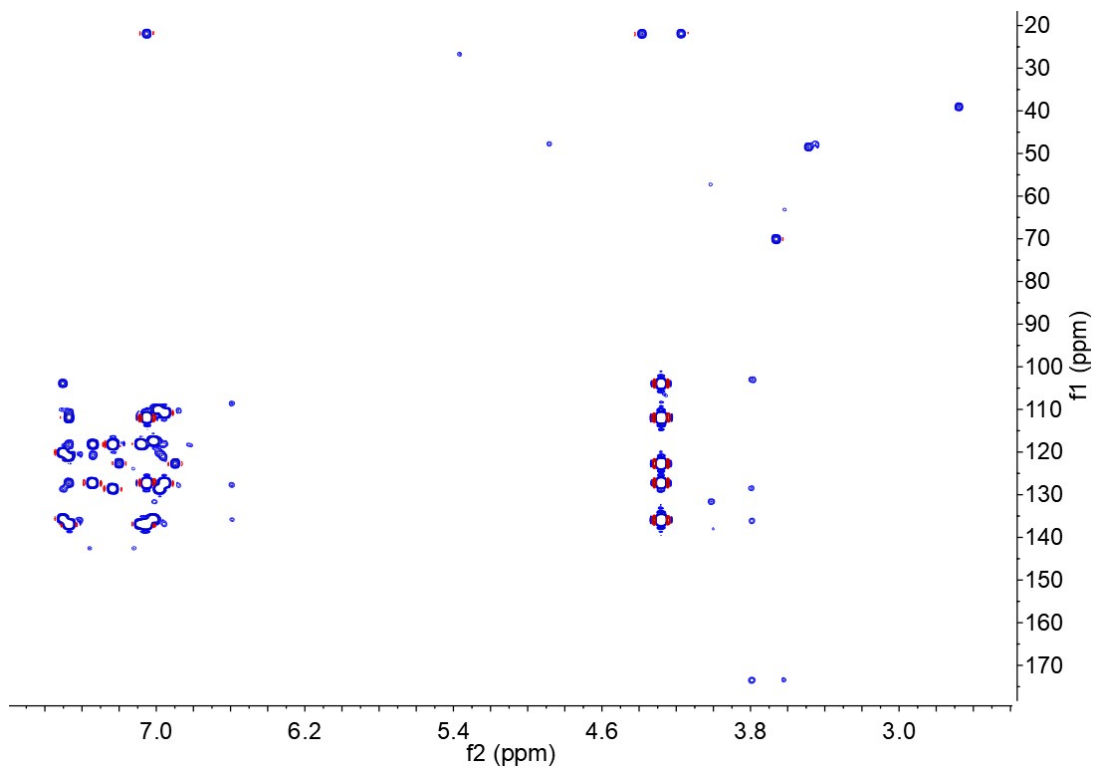

**Figure S21.** The HMBC spectrum of **4** in CD<sub>3</sub>OD (600 MHz)

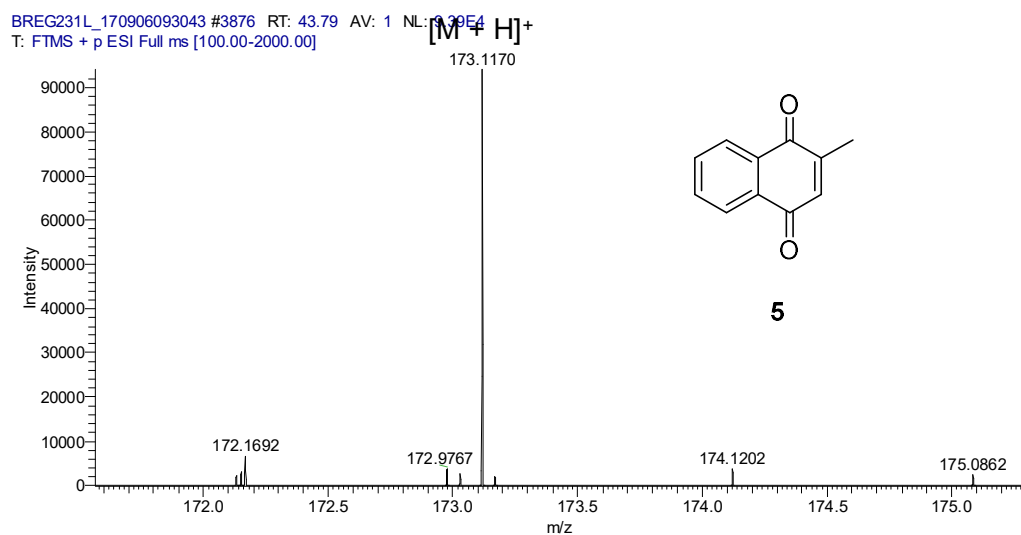

**Figure S22.** The HR-ESIMS spectrum of **5**

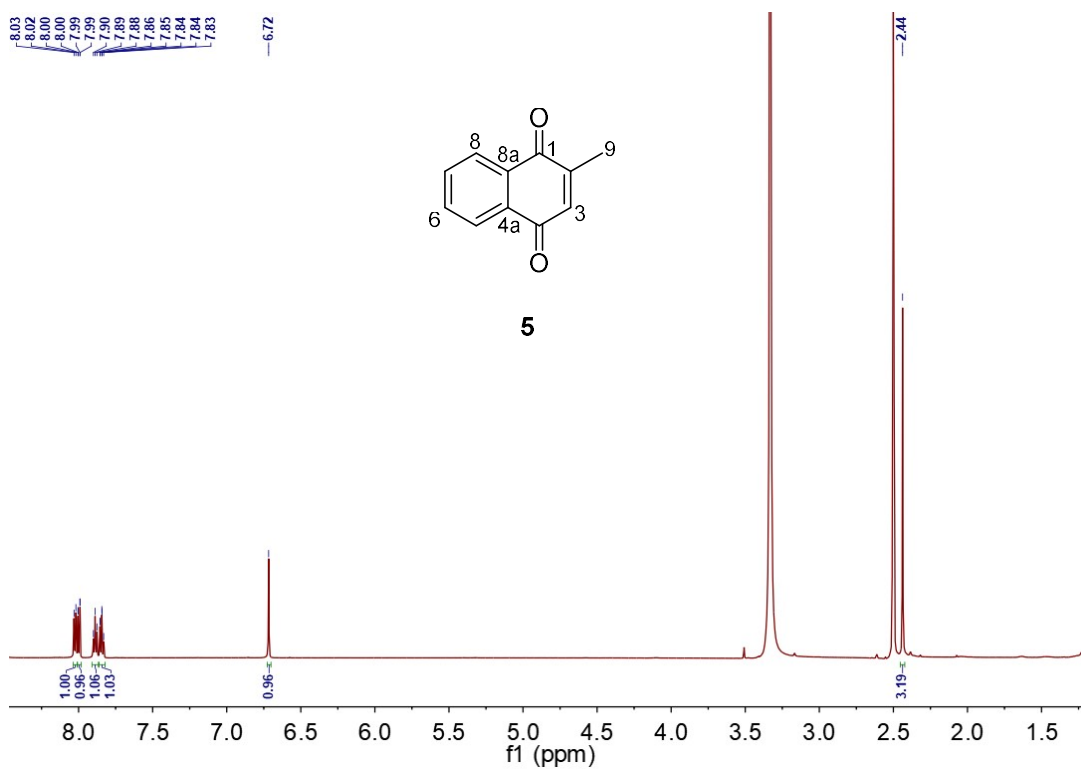

**Figure S23.** <sup>1</sup>H NMR spectrum of **5** in DMSO-*d*<sub>6</sub> (600 MHz)

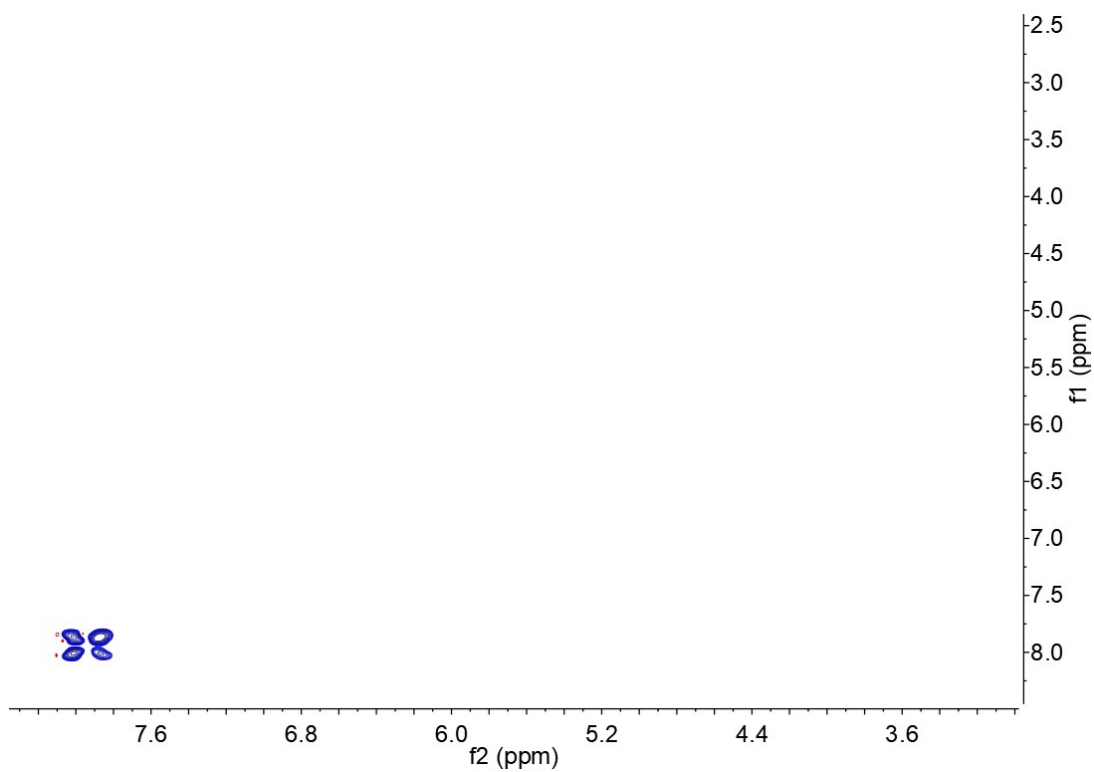

**Figure S24.** The  $^1\text{H}$ - $^1\text{H}$  COSY spectrum of **5** in  $\text{DMSO}-d_6$  (600 MHz)

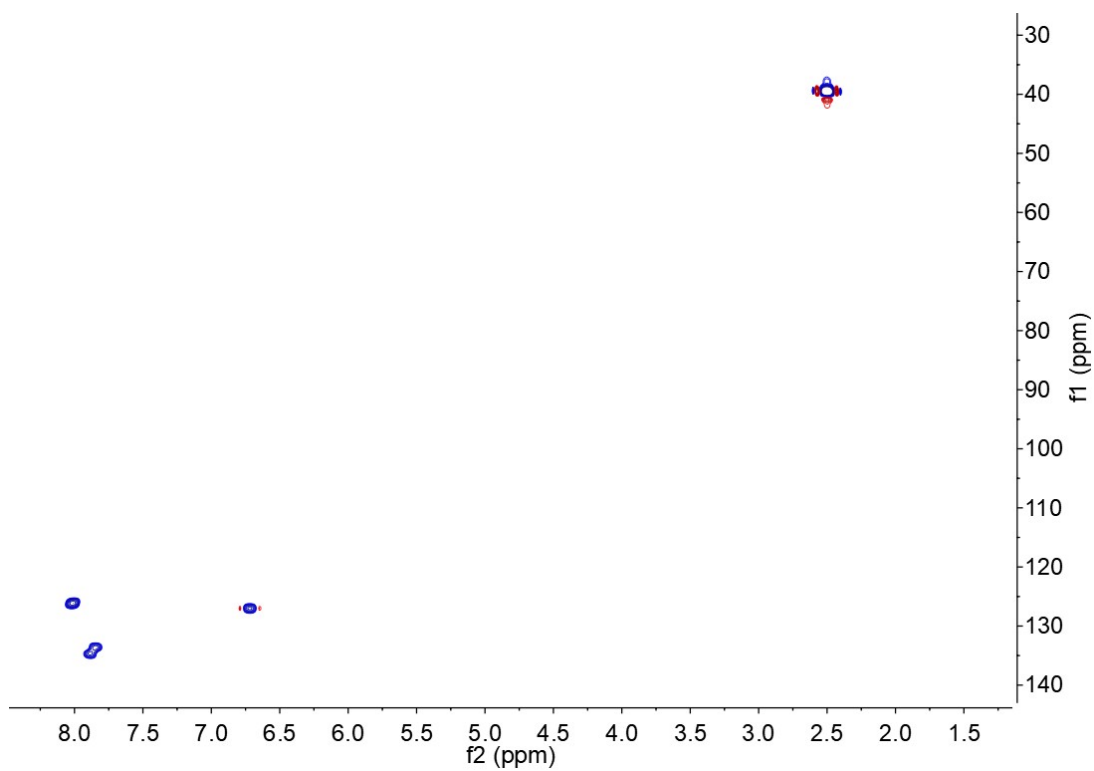

**Figure S25.** The HSQC spectrum of **5** in  $\text{DMSO}-d_6$  (600 MHz)

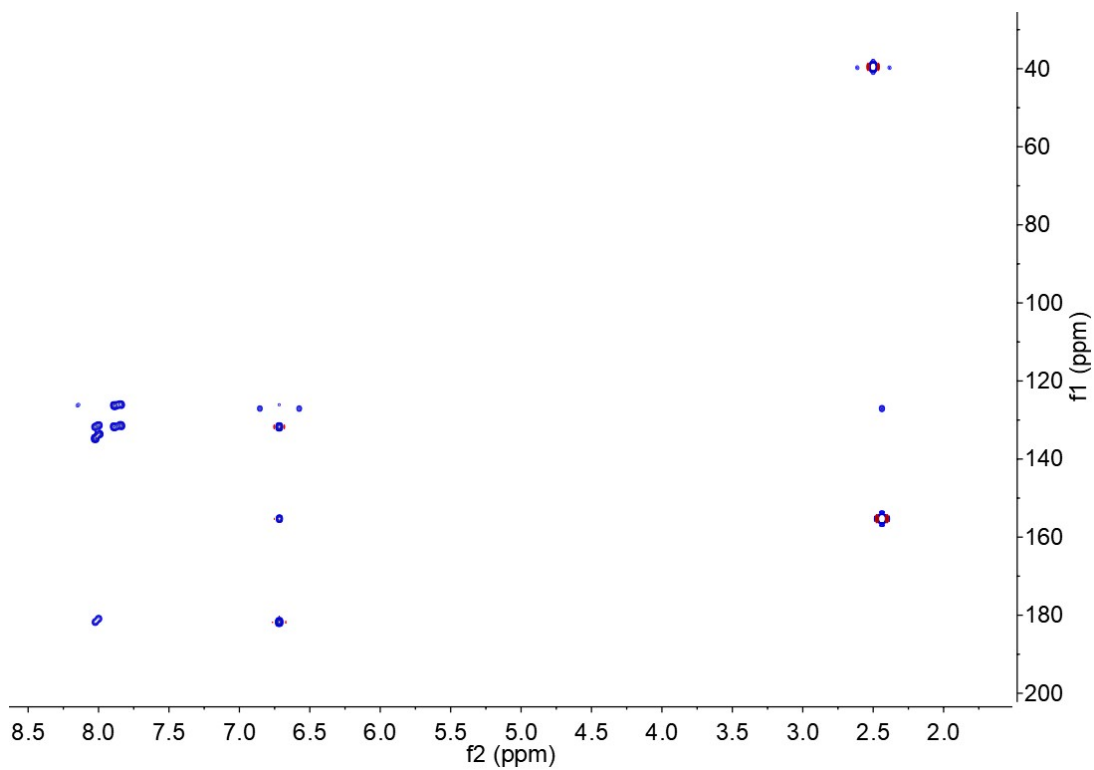

**Figure S26.** The HMBC spectrum of **5** in DMSO- $d_6$  (600 MHz)

**Table S1.** The  $^1\text{H}$  and  $^{13}\text{C}$  NMR chemical shifts of **1** in DMSO- $d_6$  (600 MHz)

| Position | <b>1</b>          |       |
|----------|-------------------|-------|
| 2        | 8.28 (1H, s)      | 138.4 |
| 3        |                   | 118.1 |
| 4        | 8.08 (1H, d, 7.2) | 120.7 |
| 5        | 7.21 (1H, m)      | 122.0 |
| 6        | 7.25 (1H, m)      | 123.3 |
| 7        | 7.52 (1H, d, 8.4) | 112.3 |
| 8        | 9.93 (1H, s)      | 184.9 |
| 3a       |                   | 124.1 |
| 7a       |                   | 137.1 |



**Table S2.** The  $^1\text{H}$  and  $^{13}\text{C}$  NMR chemical shifts of **2** in  $\text{CD}_3\text{OD}$  (500 MHz)

| Position | <b>2</b>          |       |
|----------|-------------------|-------|
| 2        | 7.15 (1H, s)      | 123.2 |
| 3        |                   | 108.0 |
| 4        | 7.53 (1H, d, 7.5) | 118.1 |
| 5        | 6.99 (1H, t, 7.0) | 118.3 |
| 6        | 7.08 (1H, t, 7.0) | 121.0 |
| 7        | 7.32 (1H, d, 7.5) | 110.8 |
| 8        | 3.72 (2H, s)      | 30.6  |
| 9        |                   | 173.3 |
| 3a       |                   | 127.3 |
| 7a       |                   | 136.5 |

**Table S3.** The  $^1\text{H}$  and  $^{13}\text{C}$  NMR chemical shifts of **4** in  $\text{CD}_3\text{OD}$  (600 MHz)

| Position | <b>4</b>          |       |
|----------|-------------------|-------|
| 2        |                   | 135.9 |
| 3        |                   | 103.9 |
| 4        | 7.50 (1H, d, 7.8) | 117.4 |
| 5        | 6.99 (1H, m)      | 118.2 |
| 6        | 7.01 (1H, m)      | 120.1 |
| 7        | 7.23 (1H, d, 7.2) | 110.2 |
| 8        | 3.77 (2H, s)      | 29.8  |
| 9        |                   | 173.5 |
| 2'       | 7.05 (1H, s)      | 122.7 |
| 3'       |                   | 112.7 |
| 4'       | 7.47 (1H, d, 8.4) | 118.3 |
| 5'       | 6.95 (1H, m)      | 118.2 |
| 6'       | 7.08 (1H, t, 7.8) | 121.0 |
| 7'       | 7.34 (1H, d, 7.8) | 110.7 |
| 8'       | 4.28 (2H, s)      | 21.8  |
| 3a       |                   | 128.6 |
| 7a       |                   | 135.7 |
| 3a'      |                   | 127.2 |
| 7a'      |                   | 136.9 |

**Table S4.** The  $^1\text{H}$  and  $^{13}\text{C}$  NMR chemical shifts of **5** in DMSO- $d_6$  (600 MHz)

| Position | <b>5</b>                |
|----------|-------------------------|
| 1        | 181.8                   |
| 2        | 155.3                   |
| 3        | 6.72 (1H, s) 127.0      |
| 4        | 180.9                   |
| 5        | 8.00 (1H, d, 7.8) 126.1 |
| 6        | 7.89 (1H, t, 6.6) 134.7 |
| 7        | 7.85 (1H, t, 6.6) 133.6 |
| 8        | 8.02 (1H, d, 7.8) 126.4 |
| 9        | 2.44 (3H, s) 12.7       |
| 4a       | 131.8                   |
| 8a       | 131.4                   |

**Table S5.** The plasmids used in this study.

| Plasmids | Description                                                  | Reference or source |
|----------|--------------------------------------------------------------|---------------------|
| pWLI806  | pMT3, Integrative vector, derivative of pSET152              | [1]                 |
| pWLI823  | pWLI807 derivative where G231 in VioA was mutated to leucine | unpublished data    |

**Table S6.** Primer pairs used in this study

| gene        | Primer pairs used for PCR confirmation of the strains (5'-3') |
|-------------|---------------------------------------------------------------|
| <i>thio</i> | <i>thio</i> CF: GGCCCGATCAAGGCGAATAC                          |
|             | <i>thio</i> CR: CCGAGGAACAGAGGCGCTTA                          |
| <i>vioA</i> | <i>vio</i> ACF:CGCACCCCCTGGTCAACGCG                           |
|             | <i>vio</i> ACR:TCACGCCGCCAGACCCAC                             |

## Reference

(1) Huang, H.; Hou, L.; Li, H.; Qiu, Y.; Ju, J.; Li, W. *Microb. Cell Fact.* **2016**, 15, 116.
